# Supplementary material
Source: PubMed Central journal article supplement (PMC11335042)

Supplementary Figure 1: Uncropped immunoblots from main figures (Figure 1, Figure 2, Figure 3, Figure 5, and Figure 6). Dashed rectangles indicate the approximate cropping used in the main figures.

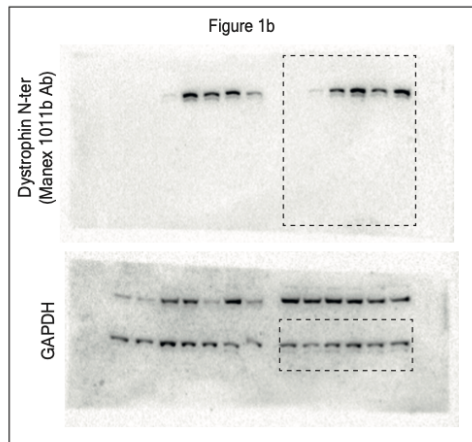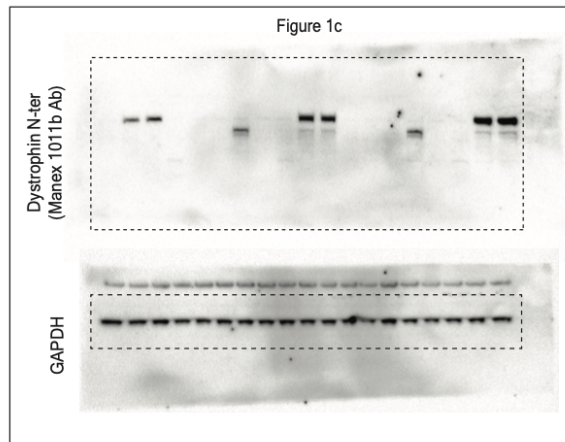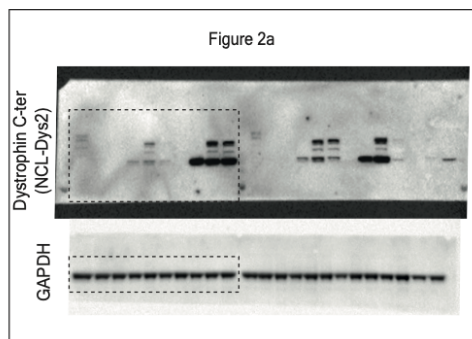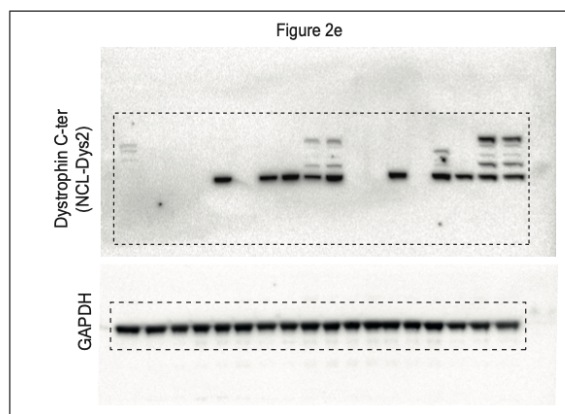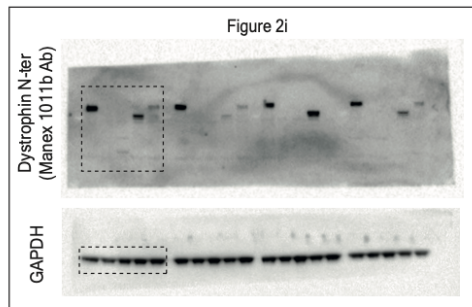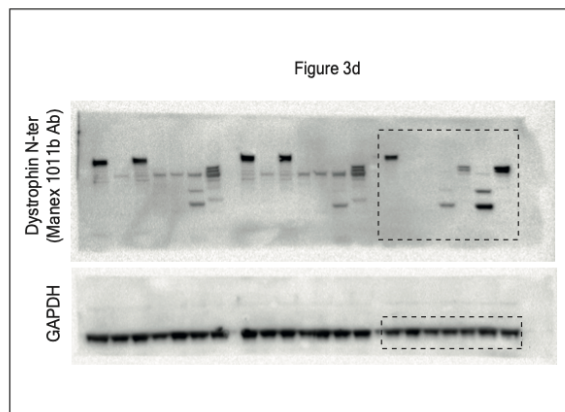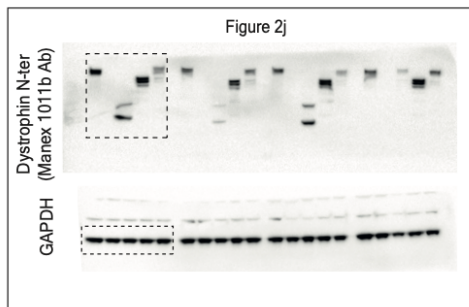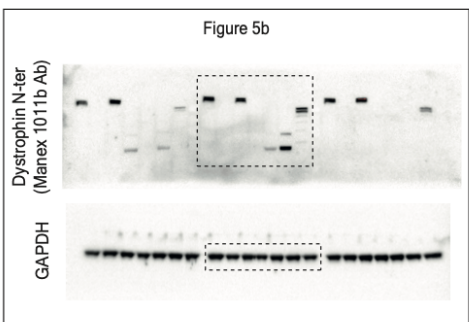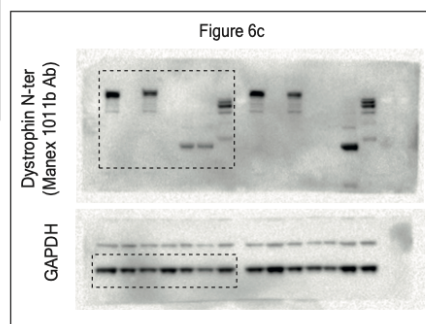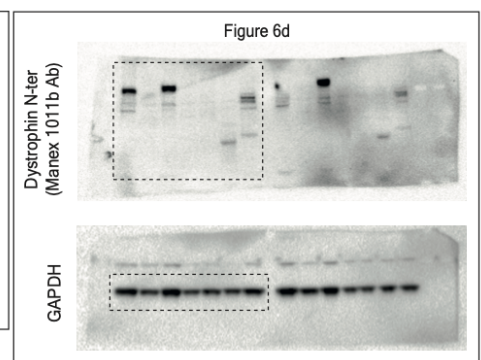

Supplementary Figure 2: Uncropped western blots from extended data figures (Extended Data Fig. 4e, Extended Data Fig. 5c, Extended Data Fig. 7e, Extended Data Fig. 7f, Extended Data Fig. 8b, and Extended Data Fig. 9b). Dashed rectangles indicate the approximate cropping used in the Extended data figures.

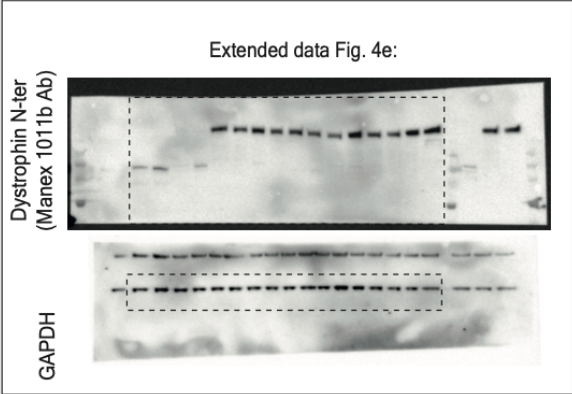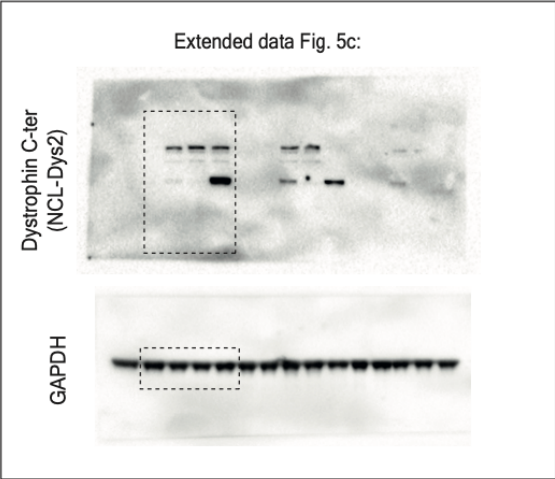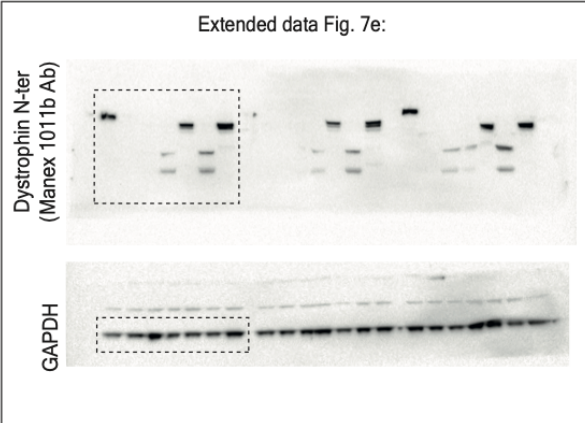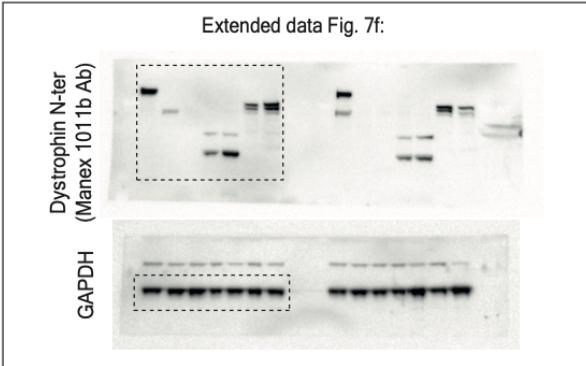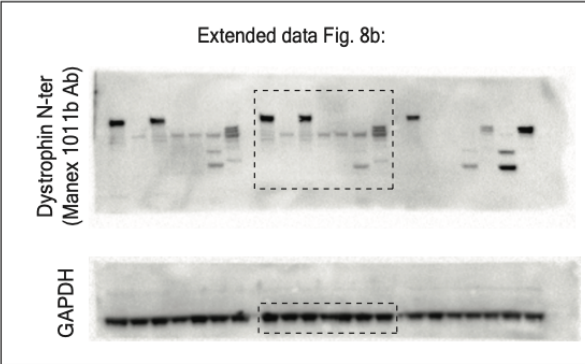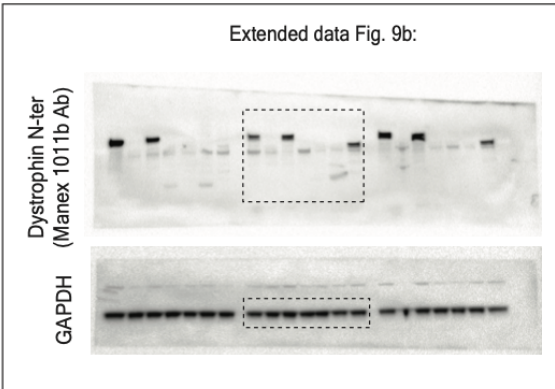

Supplement: NIHMS2010712-supplement-Supplementary_Figures.pdf [file NIHMS2010712-supplement-Supplementary_Figures.pdf]
